# Supplementary material
Source: PubMed Central journal article supplement (PMC1895532)
Supplement: blood_blood-2005-12-010660_1.pdf [file blood_blood-2005-12-010660_1.pdf]

| Gene region | PCR Conditions <sup>a</sup>                        | Primer names                 | Primer sequences                                |
|-------------|----------------------------------------------------|------------------------------|-------------------------------------------------|
| Exon 1      | 94°C/15 s,<br>TD 65/55°C/30 s, 2°C↘<br>72°C/1 min  | Ep Red 1U<br>Ep Red 1L       | CCGATCCCAGACTCCAGAA<br>CGCCTCGGGCGGAACCTG       |
| Exon 2      | 94°C/1 min,<br>TD 65/55°C/30 s, 2°C↘<br>72°C/1 min | Ep Red 2U<br>Ep Red 2L       | CTGGGAAGGGTGGTAATGGATA<br>GGATGGGAGGTCTGGGGAACA |
| Exon 3      | 94°C/1 min,<br>TD 65/55°C/30 s, 2°C↘<br>72°C/1 min | Ep Red 3U<br>Ep Red 3L       | TGGCAGGAGGAGGGGGTAA<br>GCGTAAGCCACCACATCT G     |
| P1          | 94°C/1 min,<br>TD 65/57°C/30 s, 2°C↘<br>72°C/1 min | Ep Red P1U<br>Ep Red P1L     | GGGCGCCATGATAGTAGA<br>AAACCAGCCACGGAGCAG        |
| P2          | 94°C/1 min,<br>TD 65/55°C/30 s, 2°C↘<br>72°C/1 min | Ep Red P2U<br>Ep Red P2L     | CCTAACTCGCCCCGTTGA<br>GCCCCACGCCTCCCACTC        |
| G1          | 94°C/1 min,<br>TD 65/57°C/30 s, 2°C↘<br>72°C/1 min | Ep Red G1U<br>Ep Red G1L     | GTTCGCGCGTCTTCTCCTC<br>CCTGGGCTATCCTCTGTTC      |
| G2          | 94°C/1 min,<br>TD 65/57°C/30 s, 2°C↘<br>72°C/1 min | Ep Red G2U<br>Ep Red G2L     | CTACCATGCCCCACCAACA<br>GCCACCTCCCGAACACTCC      |
| 3' NC       | 94°C/1 min,<br>TD 65/55°C/30 s, 2°C↘<br>72°C/1 min | Ep Red 3'NCU<br>Ep Red 3'NCL | TGAGCCCTCAACCCAAGC<br>GAGGCCCAGCACCACAGT        |

P1 and P2 correspond to the promoter sequences from -710 to +192 and +54 to +476, respectively, where the +1 position is the transcriptional start site (Genbank accession number NC 000016). G1, G2 and 3' NC correspond to positions +191 to 1236, +1992 to 3367 and the 3' noncoding sequence, respectively.

<sup>a</sup>PCR was performed using the “touchdown” (TD) method: after a 94°C denaturation step (extent indicated on the right), a hybridization step was performed (30 sec, the initial and final temperatures are indicated) with 2°C temperature decrements (↘) every three cycles. The last 15 cycles were carried out at the final temperatures shown, and extension was then performed as indicated.
